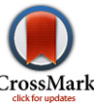

# Growth Rate of *Usnea aurantiacoatra* (Jacq.) Bory on Fildes Peninsula, Antarctica and Its Climatic Background

Ying Li<sup>1,2</sup>, Bernd Kromer<sup>3</sup>, Gerd Schukraft<sup>2</sup>, Olaf Bubenzer<sup>2</sup>, Man-Rong Huang<sup>4</sup>, Ze-Min Wang<sup>5</sup>, Lin-Gen Bian<sup>6</sup>, Cheng-Sen Li<sup>1\*</sup>

**1** Institute of Botany, Beijing, China, **2** Heidelberg University, Heidelberg, Germany, **3** Klaus-Tschira-Labor (Curt-Engelhorn-Zentrum Archäometrie gGmbH), Mannheim, Germany, **4** Beijing Museum of Natural History, Beijing, China, **5** Wuhan University, Hubei, China, **6** Chinese Academy of Meteorological Sciences, Beijing, China

## Abstract

The ages of a fruticose lichen of *Usnea aurantiacoatra* (Jacq.) Bory, from Fildes Peninsula, King George Island, Southwest Antarctic, were determined by radiocarbon (<sup>14</sup>C), and it is 1993–1996 at bottom and 2006–2007 at top of the lichen branch. The growth rates of *U. aurantiacoatra* calculated are 4.3 to 5.5 mm year<sup>-1</sup> based on its length and ages. The comparisons show that the growth rates of *U. aurantiacoatra* are higher than those of *U. antarctica* (0.4 to 1.1 mm year<sup>-1</sup>). The growth rates of fruticose lichens are always higher, usually >2 mm year<sup>-1</sup>, than those of crustose ones, usually <1 mm year<sup>-1</sup>, in polar areas. A warming trend on Fildes Peninsula is recorded in the period from 1969 to 2010 obviously: the mean annual temperature rose from -2.75 to -1.9°C and the average temperature of summer months from 0.95 to 1.4°C, as well as the average temperature of winter months from -6.75 to -5.5°C. The alteration of lichen growth rates in polar areas may respond to the climatic and environmental changes, and the lichens may act as bio-monitor of natural condition.

**Citation:** Li Y, Kromer B, Schukraft G, Bubenzer O, Huang M-R, et al. (2014) Growth Rate of *Usnea aurantiacoatra* (Jacq.) Bory on Fildes Peninsula, Antarctica and Its Climatic Background. PLoS ONE 9(6): e100735. doi:10.1371/journal.pone.0100735

**Editor:** Navnith K. P. Kumaran, Agharkar Research Institute, India

**Received:** December 17, 2013; **Accepted:** May 30, 2014; **Published:** June 26, 2014

**Copyright:** © 2014 Li et al. This is an open-access article distributed under the terms of the Creative Commons Attribution License, which permits unrestricted use, distribution, and reproduction in any medium, provided the original author and source are credited.

**Funding:** This study was supported by the International Cooperation Project of Chinese Arctic and Antarctic Administration (No. IC 201103), the Innovation Key Program of the Chinese Academy of Sciences (No. KSCX2-EW-J-1) and the National Natural Science Foundation of China (No. 41271222). Curt-Engelhorn-Zentrum Archäometrie gGmbH provided support in the form of a salary for author BK, but did not have any additional role in the study design, data collection and analysis, decision to publish, or preparation of the manuscript. The specific roles of these authors are articulated in the 'author contributions' section.

**Competing Interests:** Bernd Kromer is working in the Klaus-Tschira-Labor (Curt-Engelhorn-Zentrum Archäometrie gGmbH). There are no patents, products in development or marketed products to declare. Cheng-Sen Li is a PLOS ONE Editorial Board member. This does not alter the authors' adherence to all the PLOS ONE policies on sharing data and materials.

\* Email: lics@ibcas.ac.cn

## Introduction

Lichens, as a unique organism with dual nature, are composed by fungi (mycobionts) and algae or cyanobacteria (photobionts) in a symbiotic relationship and became the most prominent component in vegetation [1–3]. Lichens adapt to the extremely adverse ecological conditions from the warm and wet areas along Equator to the cold land in polar region, occupying the natural substrates of rock, soil, trees, etc. in the different habitats of plains, mountains and deserts. Because of their tenacious vitality, lichens, as the primary bio-pioneer, colonize the de-glaciated landscapes in alpine and polar areas [4]. The growth rate of lichen depends on habitat structure, climatic conditions, nutritional uptake and their metabolism. The most lichen species under enriched environmental conditions shows poor growth [5–8], Lichens grow extremely slowly with their relatively longevity, and are useful for dating in investigating landscapes, earthquakes, glaciers and archeological remains [4,9]. Lichens are also sensitive to air quality, especially to pollutions, and thus become a congenital bio-monitor for environmental changes [10].

The Antarctic is defined geographically as the lands and adjoining ice shelves in the south of latitude 60°S. King George Island (61°50'–62°15' S, 57°30'–59°00' W), as the largest island of South Shetland Islands in Antarctic, locates about 120 km from the Antarctic continent and about 1100 km from the southern peak of South American continent [11,12]. South Shetland

Islands, including King George Island, belong to the cold-Antarctic zone [1]. Fildes Peninsula (61°51'–62°15' S, 57°30'–59°00' W) locates at the southwestern part of King George Island, with its widths varying from 2 to 5 km and its length of approximately 10 km. The substance of Fildes Peninsula composed mainly of basalt, basaltic andesite, volcanoclastic sedimentary rocks and pyroclastic rocks [13]. It is a cold moist maritime climate in Fildes Peninsula and characterized by mean annual air temperatures of -2.1°C [13] and mean air temperatures of above 0°C for up to four months in summer. Precipitation there ranges between 350 and 500 mm per year, with rainfall occurring mainly in summer [14].

Two species of the fruticose lichen *Usnea*, *U. aurantiacoatra* (Jacq.) Bory and *U. antarctica* Du Rietz, grow on Fildes Peninsula, as the most dominant members of lichens there [15]. The growth rates of fruticose lichens are not easy to be measured in field, in comparison with the crustose and foliose ones [4,16]. In this work, the basal and terminal parts of a branch of *U. aurantiacoatra* collected from Fildes Peninsula were dated by <sup>14</sup>C and hence the growth rates of this lichen are estimated to be 4.3 to 5.5 mm year<sup>-1</sup> and are compared with those of other fruticose lichens, including *U. antarctica*, and also of crustose lichens living mainly in polar areas. The climatic conditions for the growths of *U. aurantiacoatra* and *U. antarctica* are considered in this work.

## Materials and Methods

### Collecting site of *Usnea aurantiacoatra* (Jacq.) Bory

The specimen of *U. aurantiacoatra* studied here were collected from Fildes Peninsula, King George Island, Shetland, the southwest Antarctic by the last author C. S. Li during the 23<sup>rd</sup> Chinese National Antarctica Research Expedition in January 2007 and the specimen collection was permitted by the Chinese Arctic and Antarctic Administration, the State Oceanic Administration, People's Republic of China. The coordinate of the collecting site is 62°12'42" S and 58°58'55" W, with its altitude of 43 m (Fig. 1). The basic substance of the site consists of basalt, and more than 40% land surface of Fildes Peninsula is covered by lichens and mosses.

The collected specimen of *U. aurantiacoatra* was sealed in an airtight plastic bag and put in a box in dark for 3 years until the end of 2009, when it was transported to the laboratory at ETH Zurich in Swiss for dating.

### Description of *Usnea aurantiacoatra* (Jacq.) Bory

Thallus fruticose, 30 to 60 mm high, caespitose, more or less dorsiventral, irregularly dichotomous, richly branched above with abundant attenuate branchlets, main branches obvious. Branches terete, rust red to black at base, yellow-green at other parts, variegate above with wide bands of black pigment, continuously pigmented towards the apices. Surface matt with verrucae, without soredia and isidia. Apothecia abundant, terminal on branches, cupular to bowl-shaped, up to 8 mm in diameters, black, excipulum with numerous verrucae. Pycnidia not seen.

The lichens of *U. aurantiacoatra* are generally upright in growth and widespread on Fildes Peninsula. They are very abundant on the surface of acid and exposed rocks, and also grow in the habitat of mosses [15,17].

### Dating of *Usnea aurantiacoatra* (Jacq.) Bory

Two samples, the top part (named Sample A) and the basal part (Sample B) of a branch of *U. aurantiacoatra*, were taken for dating (Fig. 2 and 3). The top part is an apothecium and the basal is the holdfast attaching to the rock surface.

The sample was dated by AMS-<sup>14</sup>C in the ETH Zurich. The sample was pre-treated by the ABA method (Acid-Base-Acid), i.e. kept in 4% HCl at 60°, 0.4% NaOH at room temperature and 1N HCl at 60° for one hour each step. The insoluble fraction was combusted in an Elemental Analyzer and converted to graphite using Fe as catalyst. <sup>14</sup>C/<sup>12</sup>C ratios (F<sup>14</sup>C, i.e. the ratio of <sup>14</sup>C/<sup>12</sup>C in the sample compared to the standard, Reimer et al. 2004) were determined in the MICADAS spectrometer [18].

## Result

### Dating results

**<sup>14</sup>C/<sup>12</sup>C ratios.** The sample of *U. aurantiacoatra* had F<sup>14</sup>C >1, i.e. it had taken up anthropogenically created <sup>14</sup>C from the atmospheric bomb testing after 1955, culminating in a doubling of atmospheric <sup>14</sup>C in 1962/3.

The branch of *U. aurantiacoatra* selected for dating is 60 mm in length between Sample A (Fig. 2) and Sample B (Fig. 3). Sample B was determined to be produced at sometime between 1993 to 1996 after calibration and Sample A was between 2006 to 2007. The estimated age of Sample A (the branch top) coincided with the collection year (2007) of this specimen of *U. aurantiacoatra*, which can be regarded as the time of the stopping growth of the lichen. Therefore, the dating result of *U. aurantiacoatra* is accurate and reliable. Accordingly, the branch ages will fall into the range of 11 (1996 to 2007) to 14 (1993 to 2007) years.

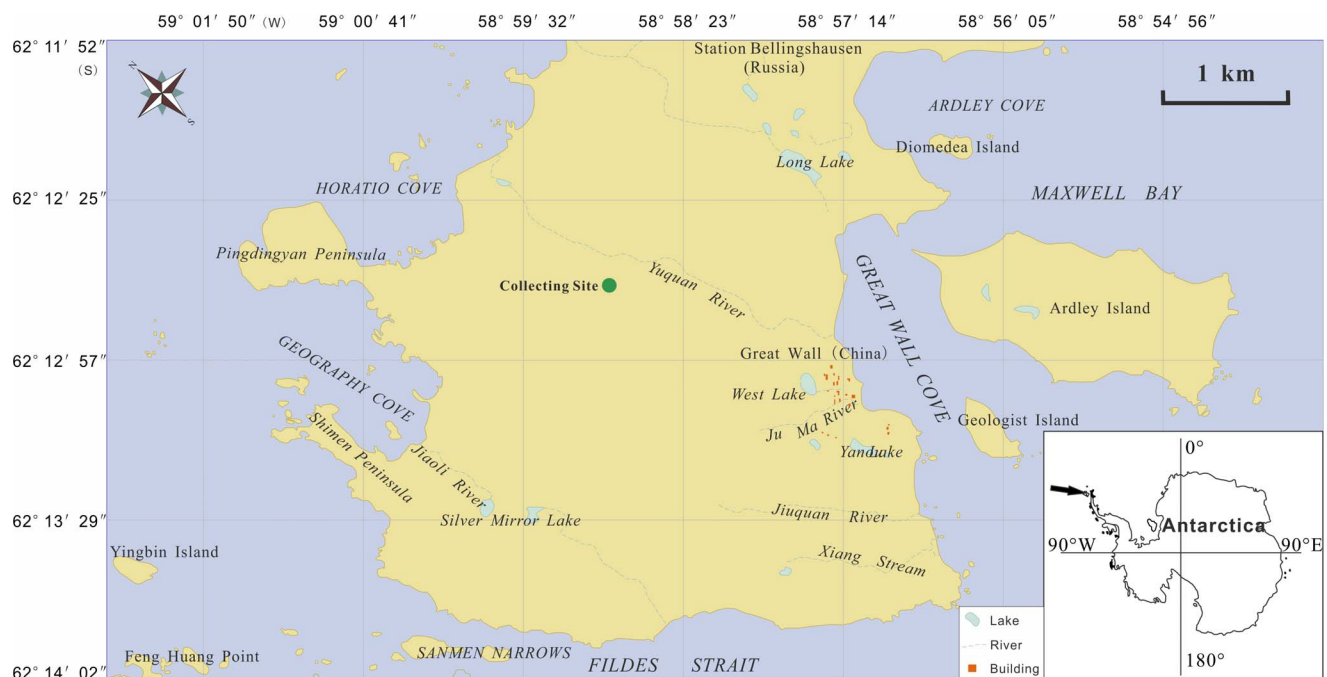

**Figure 1. Collecting site of lichen samples in Fildes Peninsula.**  
doi:10.1371/journal.pone.0100735.g001

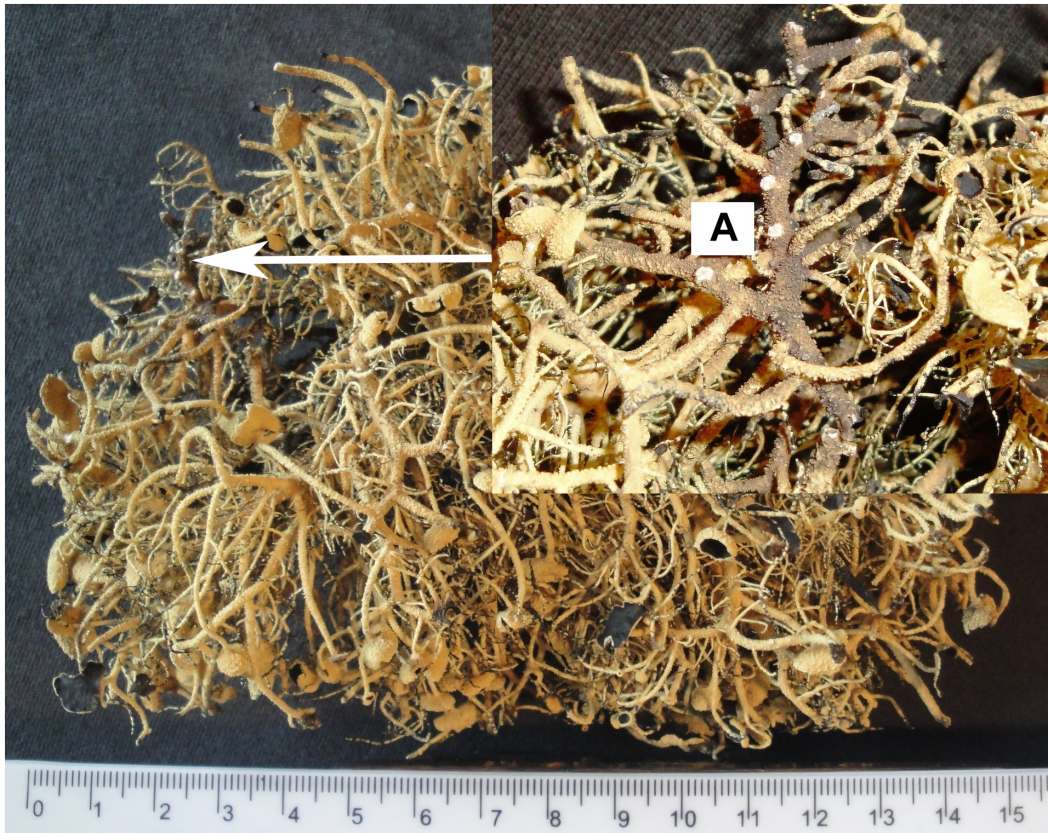

**Figure 2. The upper part of *U. aurantiacoatra*, the part which was taken as Sample A.**  
doi:10.1371/journal.pone.0100735.g002

### The growth rates

The ages of this branch are detected to be 11 to 14 years old, and the aged branch is 60 mm in length, the growth rates of the lichen are therefore 4.3 to 5.5 mm year<sup>-1</sup>.

### Discussions

As a pioneer organism, lichens can promote the weathering of rocks and pedogenesis, and create appropriate conditions for the growth of subsequent plants in the harsh environments, like desertification land and polar areas. The weathering action can be a series of physical, chemical or combined processes [19]. Comparing with bryophytes and vascular plants, the growth of lichens is very slow, especially, when they live in the extremely arid and cold habitats, such as Antarctic areas.

### The lichen of *Usnea* on Fildes Peninsula

The vegetation on King George Island is the poorly developed tundra and consists almost exclusively of cryptogams, lichens and mosses, with two species of flower plants of *Deschampsia antarctica* and *Colobanthus quitensis* [20,21].

The species of *Neuropogon* group in the genus *Usnea* thrive in Polar Regions and higher altitudes of temperate and tropical regions, and are often the dominant fruticose lichens in such harsh environments [22–24]. During the 9<sup>th</sup> and 11<sup>th</sup> Chinese National Antarctica Research Expeditions, Chen [15] collected and identified two species of this group, *U. antarctica* Du Rietz and *U. aurantiacoatra* (Jacq.) Bory, on Fildes Peninsula, and demonstrated that *U. aurantiacoatra* dominates in the local lichen vegetation.

### Comparison of the growth rates of *Usnea aurantiacoatra* (Jacq.) Bory with those of *Usnea antarctica* Du Rietz

The growth rate of *U. antarctica* was estimated based on the investigation of the lichens on Ardley Island close to Fildes Peninsula [15]. The thalli of *U. antarctica* grew on the wood block of tripods there, which was built for mapping by the staff of the station of former Soviet Union in 1970, and measured to be 7 to 20 mm in length in 1993 [15]. In general, the fresh wood block was not suitable for the lichen to grow on it at beginning years, and it is assumed that the lichens colonized the block at least 5 years later. That means the thalli of *U. antarctica* produced their length of 7 to 20 mm there in 18 years (from 1975 to 1993), corresponding to a growth rate of 0.4 to 1.1 mm year<sup>-1</sup> [15].

Another example of the growth rate of *U. antarctica* was provided on a moraine (62°39'S, 60°23'W, 125 m asl), which is close to the Spanish Antarctic Base Juan Carlos I in South Bay, Livingston Island, South Shetland Islands, and 1 km from the coast. Ten boulders with different sizes were selected in 1991 and were marked in two designed experimental zones. Growing upright on the boulders, the thalli of *U. antarctica* were measured in 1991 and re-measured in January 2002. The lichens grew for 22 mm in length in 11 years (Table 1 in [4]), and their growth rates were calculated to be 2.0 mm year<sup>-1</sup> [4].

Comparing with the growth rates of *U. antarctica* (0.4 to 1.1 mm, or 2.0 mm year<sup>-1</sup>), the rates of *U. aurantiacoatra* are much higher (4.3 to 5.5 mm year<sup>-1</sup>). The cause of the different rates of these two species of *Usnea* may be intrinsic. In Fildes Peninsula, *U. antarctica* appears at regions adjacent to the coast. When occasionally growing together with *U. aurantiacoatra*, it often occurs

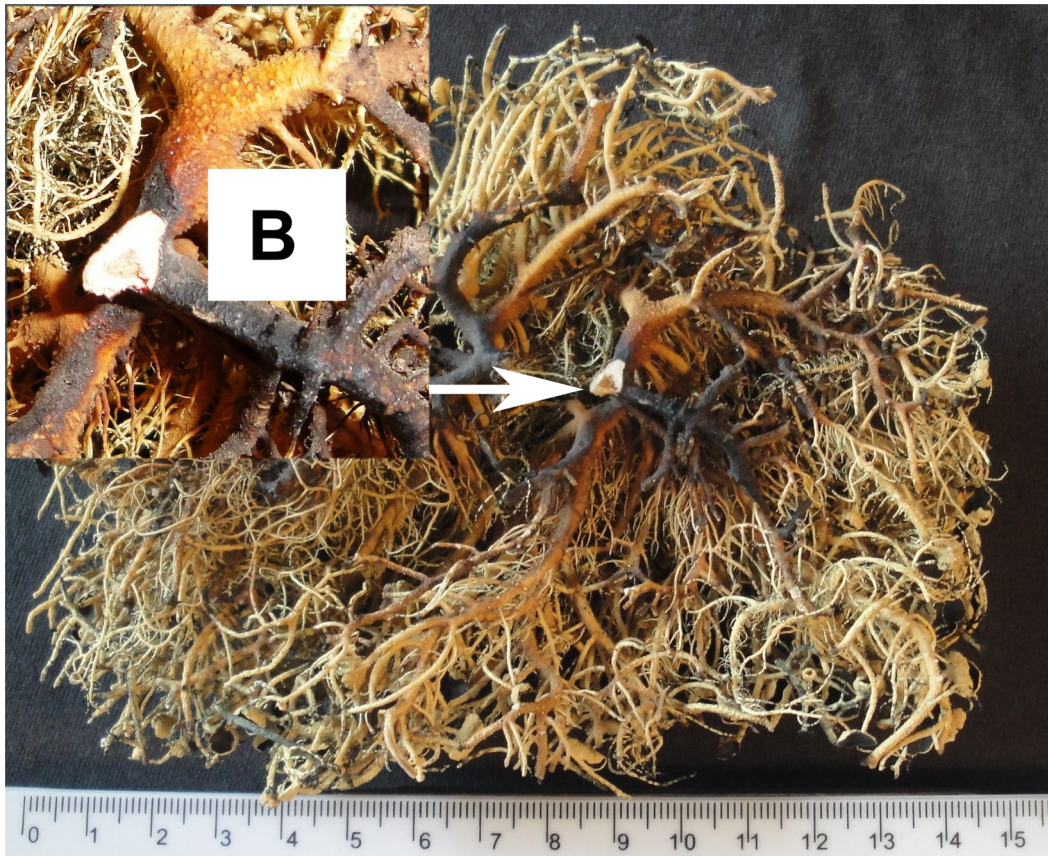

**Figure 3.** The bottom part of *U. aurantiacoatra*, the part which was taken as Sample B.  
doi:10.1371/journal.pone.0100735.g003

at the margin of the population of the latter [15]. Therefore, it seems that *U. antarctica* is less competitive than *U. aurantiacoatra*.

### Comparing the growth rates of *U. aurantiacoatra* (Jacq.) Bory with those of other fruticose lichens

The linear growth rates of *Cladonia rangiferina* (L.) Weber ex F.H. Wigg. varied in different places from the North to South Hemispheres: its rates are 5.0 to 5.6 mm year<sup>-1</sup> in spruce forest on Seward Peninsula, Alaska [25], 3.9 to 4.3 mm year<sup>-1</sup> at the site from Alakitka situated in Kuusamo, northeastern Finland [26], 2.7 mm year<sup>-1</sup> in tundra communities on Chukotsk Peninsula, the

western Siberia [27], and 4.65 to 5.33 mm year<sup>-1</sup> on the sub-Antarctic island of South Georgia [28].

The growth rates of *C. alpestris* (L.) Rabenh. were different in two localities: they are 4.3 to 5.8 mm year<sup>-1</sup> on the Seward Peninsula, Alaska [25] and 3.3 mm year<sup>-1</sup> on Chukotsk Peninsula, the western Siberia [27]. The rates of *C. sylvatica* living on the Seward Peninsula, Alaska are 5.2 to 5.5 mm year<sup>-1</sup> [25].

The growth rates of *C. mitis* Sandst. varied from 3.0 to 3.5 mm year<sup>-1</sup> at Alakitka situated in Kuusamo, northeastern Finland [26] to 5.2 mm year<sup>-1</sup> at Pine Barrens near Mauston, Juneau County, Wisconsin, USA [29].

**Table 1.** Growth rates of fruticose lichens (\*<sup>1</sup>: [25], \*<sup>2</sup>: [27], \*<sup>3</sup>: [26], \*<sup>4</sup>: [28], \*<sup>5</sup>: [29], \*<sup>6</sup>: [7,30–32], \*<sup>7</sup>: [33], \*<sup>8</sup>: [34] cited in [35], \*<sup>9</sup>: [36] cited in [7,32]).

| Average annual growth rate (mm year <sup>-1</sup> )                |                  |
|--------------------------------------------------------------------|------------------|
| <i>Cladonia alpestris</i> * <sup>1,2</sup>                         | 3.3–5.8          |
| <i>Cladonia rangiferina</i> * <sup>1,2,3,4</sup>                   | 2.7–5.6          |
| <i>Cladonia sylvatica</i> * <sup>1</sup>                           | 5.2–5.5          |
| <i>Cladonia mitis</i> * <sup>3,5</sup>                             | 3.0–5.2          |
| <i>Cladonia coccifera</i> * <sup>6</sup>                           | 1.6–2.0          |
| <i>Evernia prunastri</i> * <sup>7</sup>                            | 2.0              |
| <i>Bryoria</i> spp. * <sup>8</sup>                                 | 13.8             |
| <i>Ramalina reticulata</i> (= <i>R. menziesii</i> ) * <sup>9</sup> | 30.0 (11.0–90.0) |

doi:10.1371/journal.pone.0100735.t001

Considering the collected data of fruticose lichens (Table 1), the rates of *U. aurantiacoatra*, 4.3 to 5.5 mm year<sup>-1</sup>, are more or less similar to those of *C. alpestris* (3.3–5.8 mm year<sup>-1</sup>), *C. rangiferina* (2.7–5.6 mm year<sup>-1</sup>), *C. sylvatica* (5.2–5.6 mm year<sup>-1</sup>) and *C. mitis* (3.0–5.2 mm year<sup>-1</sup>), but higher than those of *C. coccifera* (1.6 to 2.0 mm year<sup>-1</sup>) and *Evernia prunastri* (L.) Ach. (2.0 mm year<sup>-1</sup>). Comparing with *Bryoria* spp. (rate: 13.8 mm year<sup>-1</sup>) and *Ramalina reticulata* (Nohden) Krempelh (= *R. menziesii* Taylor) (rate: 30 mm year<sup>-1</sup>), *U. aurantiacoatra* grows more slowly.

### Comparing the growth rates of fruticose lichens with those of crustose ones in polar areas

The growths of crustose lichens were investigated mainly in the temperate and Arctic areas for dating attached substrata [37–43]. The annual radial growth rates of crustose lichens are usually < 0.5 mm year<sup>-1</sup>, for example, the lichen of *Rhizocarpon geographicum* (L.) DC. living in alpine area has a growth rate below 0.5 mm year<sup>-1</sup> [42]. But some exceptional species, like *Aspicilia alphoplaca* (Wahlenb.) Poelt & Leuckert and *Trapelia coarctata* (Turner ex Sm.) M. Choisy, may expand 1 mm year<sup>-1</sup> [4,42].

The rates of *Acarospora macrocyclos* Vain. are 1.0–1.2 mm year<sup>-1</sup> (> 1 mm year<sup>-1</sup>) in Signy and Livingston Islands, Antarctic, and it is the high rate in the crustose (Placodioid) lichens in polar areas [4,44,45].

The growth rates of most known crustose lichens in polar areas are usually less than 1 mm year<sup>-1</sup>. For example, the rates of *Rhizocarpon geographicum* are 0.025–0.5 mm year<sup>-1</sup> in Signy and Livingston Islands, and 0.1–1.4 mm year<sup>-1</sup> in Antarctic and Arctic [3,4,45–47]. The rates of *Caloplaca sublobulata* (Nyl.) Zahlbr. are 0.82–0.95 mm year<sup>-1</sup> in Livingston Island [4,47]. The rates of *Buellia frigida* Darb. are 0.01–0.07 mm year<sup>-1</sup> in Dry Valleys, Cape Hallett [3], and those of *Buellia latemarginata* Darb. are 0.5–0.87 mm year<sup>-1</sup> in Signy and Livingston Island [3,4]. The rates of *Bellemeria* sp. are 0.75 mm year<sup>-1</sup> in Livingston Island [4].

The growth rates of fruticose lichens are always higher (usually > 2 mm year<sup>-1</sup>; Table 1) than those of crustose ones (usually < 1 mm year<sup>-1</sup>; Table 2) in polar areas. Only the rates of *U. antarctica*, with 0.4 to 1.1 mm year<sup>-1</sup>, on Ardley Island are close to those of crustose lichens.

The two kinds of lichens, fruticose and crustose ones, possess the different habits and biological features. The former with a holdfast attach to the surface of substance (such as rocks) and grow as upright or pendulous branches in three-dimensions with its increasing linear length, while the latter creep on the surface and expand in two-dimensions with its increasing diameter. Perhaps, the fruticose lichens may obtain more light in 3-D growth forms for their photosynthesis than the crustose lichens in a 2-D pattern.

### The climatic background of growths of *Usnea* on Fildes Peninsula

The lichen growths are influenced by the environmental factors, including light, temperature, precipitation, attached substance, and the interaction with other organisms at immediate vicinity. In this part, we consider the temperature data of Fildes Peninsula in relation to the growths of lichens of *U. aurantiacoatra* and *U. antarctica*.

### Climatic Changes on Fildes Peninsula – Warming Period of 1969–2010

The Little Ice Age is about from 1300 to 1870 [48]. Europe, North America, and Asia faced much colder winter than usual. Mountain glaciers, such as the glaciers in the Alps, Norway, Ireland, and Alaska, were expanded rapidly. During this period, there were three maxima, beginning about 1650, about 1770, and 1850, each separated by slight warming intervals [49]. And in Antarctic, it had also a cooling period in the late 1700s and 1800s and then a warming period over the 19th century. It is in close fit with the Little Ice Age. It records the overall warming at permanently occupied stations on the Antarctic continent (data from 1959 to 1996) and Southern Ocean Island stations (data from 1949 to 1996). The 16 Antarctic Stations have recorded a warming trend with a mean rate of 0.9–1.2°C per century (0.009–0.012°C year<sup>-1</sup>), and the 22 Southern Ocean Stations have recorded a mean rate of 0.7–1.0°C per century (0.007–0.010°C year<sup>-1</sup>). Antarctic Peninsula stations show a consistent regional rate of warming that is more than twice than the average of other Antarctic Stations [50].

We collected meteorological data available from Station Bellingshausen, Russia (SBR, 62°11'47''S, 58°57'39''W, 15.4 m asl, No. 89050) [51,52] and from Great Wall Station, P. R. China (GWSC, 62°12'59''S, 58°57'52''W, 10 m asl, No. 89058) [53,54] on Fildes Peninsula. The two stations are separated by a distance of 2.1 km on the same peninsula.

The mean annual temperature (MAT) is –2.3°C at SBR from 1969 to 2010 and –2.1°C at GWSC from 1985 to 2012. The average summer monthly temperature (ASMT in January and February) is 1.6°C at SBR from 1969 to 2010 and 1.8°C at GWSC from 1985 to 2010. The average winter monthly temperature (AWMT in July and August) is –6.4°C at SBR from 1969 to 2010 and –5.9°C at GWSC from 1985 to 2010 (Fig. 4, 5 and 6) [55,56]. So the difference of MATs and ASMTs of two stations is about 0.2°C, and the difference of AWMTs of two stations is about 0.5°C.

The MATs of two stations have been rising from –2.75 to –1.9°C in the period from 1969 to 2010 (Fig. 4, red line) and the ASMTs (December, January and February) rising from 0.95 to

**Table 2.** Growth rates of crustose lichens in polar areas (\*<sup>1</sup>: [44], \*<sup>2</sup>: [45,46], \*<sup>3</sup>: [47], \*<sup>4</sup>: [3], \*<sup>5</sup>: [4]).

| Average annual growth rate (mm year <sup>-1</sup> )  |                      |
|------------------------------------------------------|----------------------|
| <i>Acarospora macrocyclos</i> * <sup>1,2,5</sup>     | 1.0–1.2              |
| <i>Rhizocarpon geographicum</i> * <sup>2,3,4,5</sup> | 0.025–0.5<br>0.1–1.4 |
| <i>Caloplaca sublobulata</i> * <sup>3,5</sup>        | 0.82–0.95            |
| <i>Buellia latemarginata</i> * <sup>4,5</sup>        | 0.5–0.87             |
| <i>Buellia frigida</i> * <sup>4</sup>                | 0.01–0.07            |
| <i>Bellemeria</i> sp.* <sup>5</sup>                  | 0.75                 |

doi:10.1371/journal.pone.0100735.t002

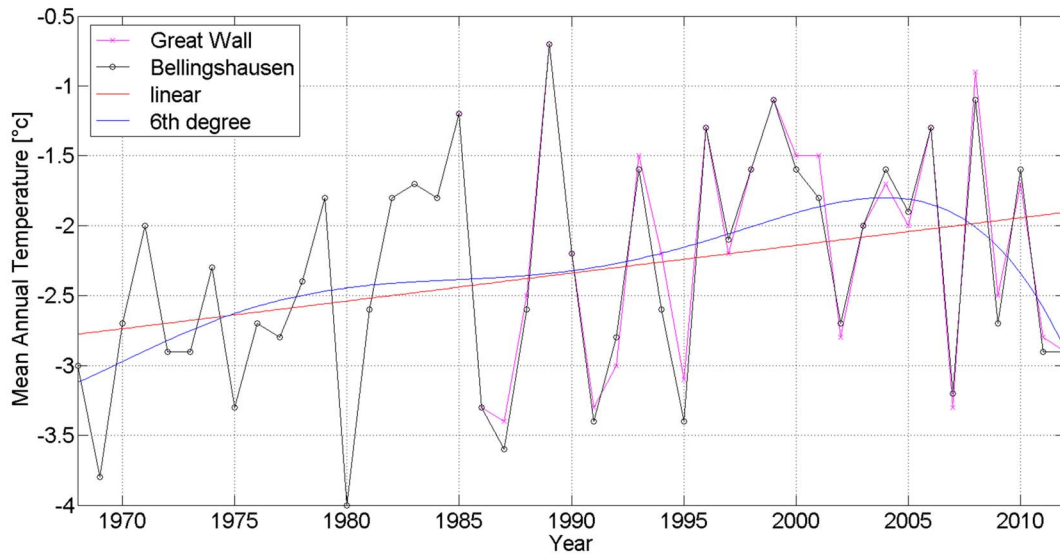

**Figure 4. The mean annual temperature at Station Bellingshausen and Great Wall Station on Fildes Peninsula, Antarctica, by using MATLAB and calculating with linear and 6<sup>th</sup> degree [55,56].**  
doi:10.1371/journal.pone.0100735.g004

1.4°C (Fig. 5, red line), as well as the AWMTs (June, July and August) rising from  $-6.75$  to  $-5.5^{\circ}\text{C}$  (Fig. 6, red line). Therefore, an obvious warming trend in Fildes Peninsula was recorded in these two stations, with the temperatures rising higher in winter than in summer ( $0.030$  vs  $0.011^{\circ}\text{C year}^{-1}$ ) in 41 years (Table 3).

An increase of the mean surface temperature of  $1$ – $5^{\circ}\text{C}$  is a key prediction of climate change in the Antarctic, but at a lower rate than in the Arctic, and precipitation is expected to increase by up to 30% across the continental Antarctica [57]. The global warming resulted in a global increase of temperature of  $0.03^{\circ}\text{C year}^{-1}$  ( $0.02$ – $0.05^{\circ}\text{C year}^{-1}$  range) is predicted to be 0.5–0.7 times larger in maritime Antarctica [3]. The mean annual temperature rose  $0.021^{\circ}\text{C year}^{-1}$  on Fildes Peninsula ( $62^{\circ}\text{S}$ ) in 41 years (in this work), less than  $0.056^{\circ}\text{C year}^{-1}$  at Faraday Station ( $65^{\circ}\text{S}$ ) in 45

years [3], both in Antarctic Peninsula. As predicted by global change models, the rise has been particularly large in winter temperatures, with the large interannual variability [58]. In our work, it proves that the temperature rise was **higher in winter than in summer** ( $0.030$  vs  $0.011^{\circ}\text{C year}^{-1}$ ) on Fildes Peninsula in the last 41 years.

The lichens grow in Antarctic mainly controlled by two factors, temperature and precipitation. When the two factors changed, the lichen growth would be influenced significantly. For example, the radial growth of *Buellia frigida* became fast with the increase of growth rate from  $0.01$  to  $0.07\text{ mm year}^{-1}$ , when the mean temperatures rose from  $-4.8$  to  $-1.4^{\circ}\text{C}$  in summer and  $-30.5$  to  $-26.4^{\circ}\text{C}$  in winter, with the precipitation increase from 50 to 225 mm in rainfall equivalent. The same things happened with

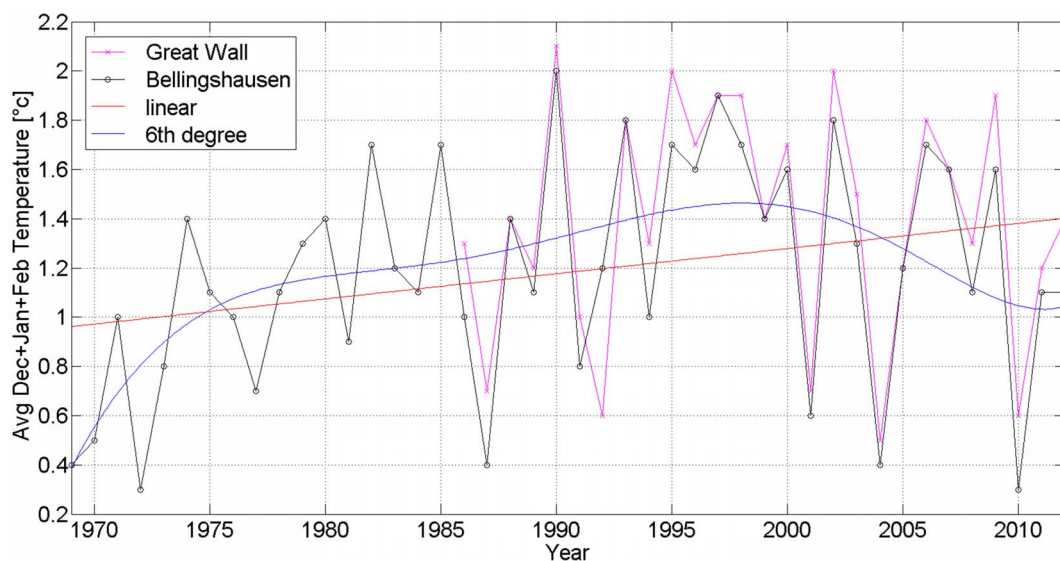

**Figure 5. The average summer monthly temperature (December, January and February) at Station Bellingshausen and Great Wall Station on Fildes Peninsula, Antarctica, by using MATLAB and calculating with linear and 6<sup>th</sup> degree [55,56].**  
doi:10.1371/journal.pone.0100735.g005

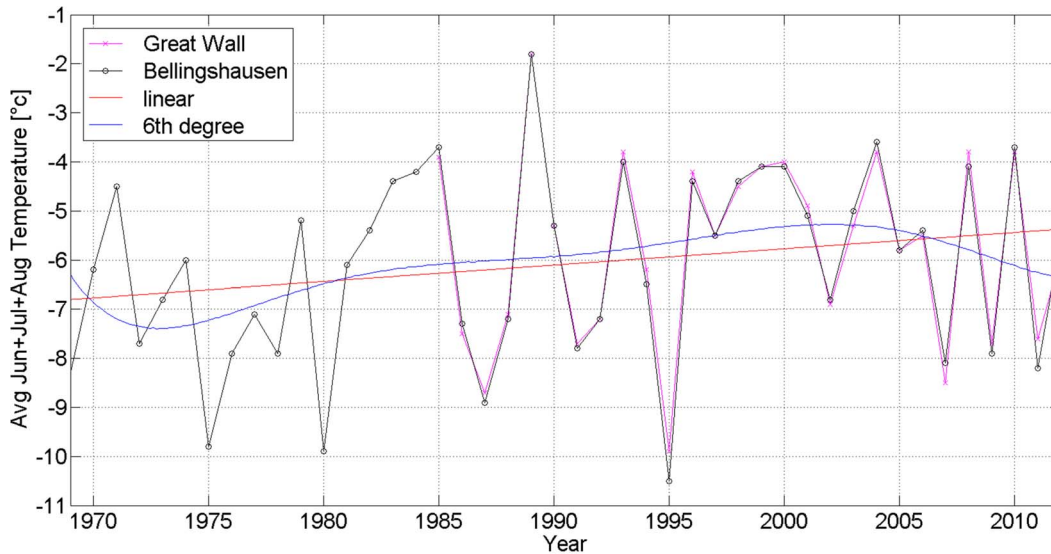

**Figure 6. The average winter monthly temperature (June, July and August) at Station Bellingshausen and Great Wall Station on Fildes Peninsula, Antarctica, by using MATLAB and calculating with linear and 6<sup>th</sup> degree [55,56].**  
doi:10.1371/journal.pone.0100735.g006

*Buellia latemarginata*, whose growth rates increased from 0.5 to 0.87 mm year<sup>-1</sup> responding to the precipitation increases from 400 to 800 mm, with the stable summer temperature (1.3 to 1.3°C) and the rising winter temperature from -9.0 to -7.0°C [3].

The different growth rates of *U. aurantiacoatra* and *U. antarctica* (4.3 to 5.5 vs. 0.4 to 1.1 mm year<sup>-1</sup>) on Fildes Peninsula may mainly attribute to their different biological features, as mentioned before. The different attached substances of these lichens, rock vs. the wood block, may also played an important role in their growth rate. The temperature changes during the years may also influence the growth of the two species.

#### Climatic Change on Antarctic – Short Cooling Period of 1979–1998

When we consider the warming period over the 19th century in Antarctic, on another hand, it has been slightly cooled from 1979 to 1998 [59]. Doran [58] also pointed out that a seasonally averaged surface air temperature in the Dry Valleys of continental Antarctica was decreased by 0.7°C per decade (0.07°C year<sup>-1</sup>) from 1986 to 1999, especially cooling of 1.2°C per decade (0.12°C year<sup>-1</sup>) in summer.

The growth rates of *U. antarctica* (from 0.4 to 1.1 mm year<sup>-1</sup>) were obtained according to the assumed growth period between 1975 and 1993 [15], with a 14-year duration falling into this cooling interval (1979 to 1993). By comparison, the growth of *U.*

*aurantiacoatra* analyzed here with its rates of 4.3 to 5.5 mm year<sup>-1</sup> was in the period between 1993 and January 2007, with a 5-year (1993 to 1998) duration falling into the cooling interval, shorter than that of *U. antarctica*. This fact may also influence the different growth rates of these two lichens in some extents.

#### Conclusion

- 1) By <sup>14</sup>C dating, a branch of *Usnea aurantiacoatra* (Jacq.) Bory was detected to be 1993–1996 at basal part and 2006–2007 at tip in ages. The latter estimated age of 2007 coincides with the collection year (2007) of this specimen in January of 2007, when the lichen stopped its growth. So, the dating result is accurate and reliable.
- 2) Based on the length (60 mm) and ages (11 to 14 years) of this branch, the growth rates of *U. aurantiacoatra*, found attached to the rocks in situ on Fildes Peninsula, were calculated to be 4.3 to 5.5 mm year<sup>-1</sup>. The rates of *U. antarctica* Du Rietz, grew on introduced substrata (wood block) on Ardley Island, were estimated to be 0.4 to 1.1 mm year<sup>-1</sup> previously.
- 3) The growth rates of fruticose lichens are always higher, usually >2 mm year<sup>-1</sup>, than those of crustose lichens, usually <1 mm year<sup>-1</sup>, in polar areas.
- 4) The mean annual temperature have been rising from -2.75 to -1.9°C in the period on Fildes Peninsula from 1969 to 2010, and the average summer monthly temperature

**Table 3. The temperature changes on Fildes Peninsula in 41 years.**

| Temperature (°C) changes in periods of 41 years (1969–2010) |               |        |                            |
|-------------------------------------------------------------|---------------|--------|----------------------------|
| Mean Annual Temperature                                     | -2.75 to -1.9 | 0.85 ↑ | 0.021 ↑ year <sup>-1</sup> |
| Average Summer Monthly Temperature                          | 0.95 to 1.4   | 0.45 ↑ | 0.011 ↑ year <sup>-1</sup> |
| Average Winter Monthly Temperature                          | -6.75 to -5.5 | 1.25 ↑ | 0.030 ↑ year <sup>-1</sup> |

doi:10.1371/journal.pone.0100735.t003

(December–February) rising from 0.95 to 1.4°C, as well as the average winter monthly temperature (June–August) rising from −6.75 to −5.5°C. A warming trend on Fildes Peninsula is obvious, especially with the temperatures rising higher in winter than in summer (0.030 vs 0.011°C year<sup>−1</sup>).

- 5) The climate and environment changes influence the lichen growths in polar areas significantly. When the ages of lichens are detected exactly, the changes of lichen growth in these ages may respond to the climate and environment changes, and the lichens may play a bio-monitor of natural condition therefore.

## References

- Longton E (1988) *Biology of polar bryophytes and lichens*. Cambridge: Cambridge University Press.
- Kappen L (2000) Some aspects of the great success of lichens in Antarctica. *Antarct. Sci.* 12, 314–324.
- Sancho LG, Allan Green TG, Pintado A (2007) Slowest to fastest: Extreme range in lichen growth rates supports their use as an indicator of climate change in Antarctica. *Flora* 202: 667–673.
- Sancho LG, Pintado A (2004) Evidence of high annual growth rate for lichens in the maritime Antarctic. *Polar Biology* 27: 312–319.
- Galum M (Ed.) (1988) *CRC Handbook of Lichenology Volumes I, II, III* (2nd ed.), CRC Press.
- Hale ME (1957) *Lichen handbook*, Smithsonian Institution, Washington D.C.
- Hale ME (1974) *The biology of lichens*. American Elsevier, New York. 2nd ed. 181 p.
- Nash TH III (Ed.) (2008) *Lichen Biology* (2nd ed.), Cambridge University Press, Cambridge, UK.
- Xayidin H, Liu LY, Mamu R, Abbas A (2005) Progress of Researches on Lichen Diversity of Xinjiang. *Journal of Fungal Research* 3 (3): 51–54.
- Chipev N (2005) Lichens as biomonitors with special reference to the Antarctic. In: *Proceedings of the International Conference on High Precision Atomic and Nuclear Methods* (Editors: Olariu A, Strenstrom K, Hellborg R), Editura Academica Romane, Bucuresti. 12–16.
- Victoria F de C, Costa DP, Pereira AB (2005) Characterization of plant communities in ice-free areas adjoining the Polish station H. Arcowski, Admiralty Bay, King George Island, Antarctica. <http://www.dna.gov.ar/CIENCIA/SANTAR04/CD/PDF/202BB.PDF> (21. 10. 2012).
- Lee JS, Lee HK, Hur JS, Anderrv M, Hong SG (2008) Diversity of the Lichenized Fungi in King George Island, Antarctica, Revealed by Phylogenetic Analysis of Partial Large Subunit rDNA Sequences. *J. Microbiol Biotechnol* 18(6): 1016–1023.
- Li YL, Zhou YL, Zhang ZW (1999) Determination and Analysis of Element Composition and Distribution of Three Kinds of Lichen by EDS in King George Island, Antarctica. *Chinese Journal of Polar Research* 11(1): 69–74.
- Michel RFM, Schaefer CEGR, Simas FNB, Poelking EL, Fernandes Filho EI (2010) Active layer thermal monitoring at two ice-free areas of King George Island, Maritime Antarctica. In: *Proceedings of the 19th World Congress of Soil Science: Soil solutions for a changing world*, Brisbane, Australia, 1–6 August 2010. Symposium 1.1.1 Soil morphology and climate change 2010 p. 1–4.
- Chen JB (1996) Lichens from Fildes Peninsula, King George Island, Antarctica I. The Genus *Usnea* Subgenus *Neuropogon*. *Acta Mycologica Sinica* 15 (1): 21–25.
- Stevenson SK (1985) Enhancing the establishment and grow of arboreal forage lichens in intensively managed forest: problem analysis. Research, Ministries of Environment and Forest. IWIFR-26. Victoria, B. C., USA.
- Kim JM, Ahn IY, Hong SG, Andreev M, Lim KM, et al. (2006) Lichen Flora around the Korean Antarctic Scientific Station, King George Island, Antarctic. *J. Microbiology* 44(5): 480–491.
- Wacker L, Bonani G, Friedrich M, Hajdas I, Kromer B, et al. (2010) MICADAS: routine and high-precision Radiocarbon dating. *Radiocarbon* 52 (2): 252–262.
- Seaward MRD (2008) Environmental role of lichens. In: Nash III, T.H. (ed.) *Lichen Biology* (2nd ed.), Cambridge University Press, Cambridge, UK.
- Olech M (2004) Lichens of King George Island, Antarctica. The Institute of Botany of the Jagiellonian University, Krakow, Poland.
- Soper T (2008) *Antarctica, a guide to the wildlife*. Bradt Travel Guides, UK; The Globe Pequot Press, USA.
- Walker EJ (1985) The lichen genus *Usnea* subgenus *Neuropogon*. *Bulletin of the British Museum (Natural History)* 13 (1): 1–130.
- Articus K (2004) *Neuropogon* and the phylogeny of *Usnea* s.l. (*Parmeliaceae*, Lichenized Ascomycetes). *Taxon* 53(4): 925–934.
- Lumbsch HT, Wirtz N (2011) Phylogenetic relationships of the neuropogonoid core group in the genus *Usnea* (Ascomycota: *Parmeliaceae*). *Lichenologist* 43(6): 553–559.
- Pegau RE (1968) Growth rates of important reindeer forage lichens on the Seward Peninsula, Alaska. *Arctic* 21(4): 255–259.
- Helle T, Aspi J, Tarvainen L (1983) The growth rate of *Cladonia rangiferina* and *C. mitis* in relation to forest characteristics in northeastern Finland. *Rangifer* 3 (2): 2–5.
- Andreev VN (1954) The growth of forage lichens and the methods for their regulation. *Trudy Botanicheskogo Instituta im. V. L. Komarova Akademii Nauk SSSR, Series 111, Geobotanika* 9: 11–74.
- Lindsay DC (1975) Growth rates of *Cladonia rangiferina* (L.) Web. on South Georgia. *British Antarctic Survey Bulletin* 40: 49–53.
- Lechowicz MJ, Dams MS (1972) Net photosynthesis of *Cladonia mitis* (Sand.) from sun and shade site on the Wisconsin pine barrens. *Ecology* 54 (2): 413–419.
- Chen JB (1995) The particularity and biological diversity of Lichens, and their importance to science and application. *Chinese Biodiversity* 3 (2): 113–117.
- Hale ME (1967) *The Biology of Lichens*. London: Edward Arnold Ltd. 78.
- Hale ME (1973) Growth. In: Ahmadjian V, M E Hale (eds.); *The Lichens*. New York and London: Academic Press, p. 473–492.
- Degelius G (1964) Biological studies of the epiphytic vegetation on twigs of *Fraxinus excelsior*. *Acta Horti Gothoburg* 27: 11–55.
- Frey E (1953) Die Flechtenflora und -Vegetation des Nationalparks im Untergadin. 1. Teil: Die Diskokarpen Blatt- und Strauchflechten. *Ergbn. Wiss. Unters. Schweiz. Nationalparks* 2: 361–503 (cited in Ahti 1962).
- Ahti T (1962) Ecological investigations on lichens in Wels Gray Provincial Park, with special reference to their importance to mountain caribou. *Uni. Helsinki, Dep. Botany, Helsinki, Finland. Unpubl. Report*. 69 p.
- Herre AWCT (1904). The growth of *Ramalina reticulata* Krempf. *Bot. Gaz. (Chicago)* 38: 218–219 (cited in Hale 1973, 1974).
- Porter SC (1981) Lichenometric studies in the Cascade Range of Washington: establishment of *Rhizocarpon geographicum* growth curves at Mount Rainier. *Arct Alp Res* 13: 11–23.
- Proctor MCF (1983) Sizes and growth rates of thalli of the lichen *Rhizocarpon geographicum* on the moraines of the Glacier de Valsorey, Valais, Switzerland. *Lichenologist* 15: 249–262.
- Chen JY (1984) General Situation of Lichenometry Research Abroad. *Journal of Glaciology and Geocryology* 6 (4): 85–93.
- Chen JY (1988) The Preliminary Studies of Several Problems on Glacier Variation Lichenology in the Holocene at the Headwaters of the Urumqi River. *Science in China (Series B)* 1: 95–104.
- Innes JL (1985) Lichenometry. *Progress in Physical Geography* 9: 187–254.
- Lichen OL (1990) Twenty-three years of growth measurements on the crustose lichen *Caloplaca aurantia* in the central Negev Desert. *Isr. J Bot* 39: 383–394.
- Sancho LG, Palacios D, De Marcos J, Valladares F (2001) Geomorphological significance of lichen colonization in a present snow hollow: Hoya del Cuchillar de las Navajas, Sierra de Gredos (Spain). *Catena* 43: 323–340.
- Hooker T (1980) Growth and production of *Cladonia rangiferina* and *Sphaerophorus globosus* on Signy Island, South Orkney Islands. *British Antarctic Survey Bulletin* 50: 27–34.
- Lewis Smith RI (1990) Signy Island as a paradigm of biological and environmental change in Antarctic terrestrial ecosystems. In Kerry, K. R. & Hempel, G., eds. *Antarctic Ecosystems. Ecological change and conservation*. Berlin Heidelberg: Springer Verlag, 32–50.
- Lewis Smith RI (1995) Colonization by lichens and the development of lichen-dominated communities in the maritime Antarctic. *Lichenologist* 27: 473–483.
- Sancho LG, Valladares F (1993) Lichen colonization of recent moraines on Livingston Island (South Shetland I., Antarctica). *Polar Biology* 13: 227–233.
- The Little Ice Age, Ca. 1300–1870: [http://www.ch-resources.org/timeline/timeline\\_jia.html](http://www.ch-resources.org/timeline/timeline_jia.html) with access on May 6, 2014.
- Earth Observatory: <http://earthobservatory.nasa.gov/Glossary/index.php?mode=alpha&seg=l&scend=n> with access on May 6, 2014.
- Hagen JO, Jeffries R, Marchant H, Nelson F, Prowse T, et al. (2001) Polar Regions (Arctic and Antarctic). In: *Climate Change 2001: Working Group II: Impacts, Adaptation and Vulnerability*, 801–842.
- Stations of SCAR Nations operating in the Antarctic: <http://www.scar.org/publications/bulletins/147/winteringstations.html> with access on May 6, 2014.
- Russian Antarctic Stations – overview: [http://www.aari.aq/default\\_en.html](http://www.aari.aq/default_en.html) with access on May 6, 2014.
- Chinese Arctic and Antarctic Administration: [http://www.chinare.gov.cn/caa/gb\\_article.php?modid=03001](http://www.chinare.gov.cn/caa/gb_article.php?modid=03001) with access on May 6, 2014.

## Acknowledgments

We wish to express our sincere gratitude to the Chinese Arctic and Antarctic Administration, the State Oceanic Administration of China. Many thanks also to the members of the 23th Chinese Antarctic Scientific Expedition teams for their help during the field work.

## Author Contributions

Conceived and designed the experiments: CSL. Performed the experiments: BK GS. Analyzed the data: YL CSL MRH ZMW LGB. Contributed reagents/materials/analysis tools: CSL. Wrote the paper: YL CSL OB.



54. Synop Information for 89058 in Great Wall (CHN), -, Antarctica (the territory South of 60 deg S): <http://weather.gladstonefamily.net/site/89058> with access on May 6, 2014.
55. Bellingshausen temperature: <http://www.antarctica.ac.uk/met/READER/surface/Bellingshausen.All.temperature.html> with access on May 6, 2014.
56. Great Wall temperature: [http://www.antarctica.ac.uk/met/READER/surface/Great\\_Wall.All.temperature.html](http://www.antarctica.ac.uk/met/READER/surface/Great_Wall.All.temperature.html) with access on May 6, 2014.
57. IPCC (2001) Climate Change 2001: The Scientific Basis. Technical Summary. IPCC, Geneva.
58. Doran PT, Prisco JC, Lyons WB, Walsh JE, Fountain AG, et al. (2002) Antarctic climate cooling and terrestrial ecosystem response. *Nature* 415: 517–520.
59. Comiso JC (1999) Variability and trends in Antarctic surface temperatures from in situ and satellite infrared measurements. *Journal of Climate* 13(10): 1674–1696.
